# Supplementary material
Source: Springer Nature journal article supplement (https://www.springermedizin.de/resource/supplementary/12958_2010_728_MOESM2_ESM.pdf/9568346)

(A)

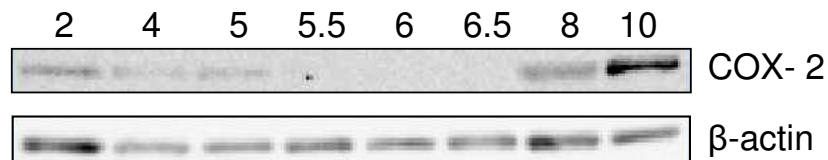

(B)

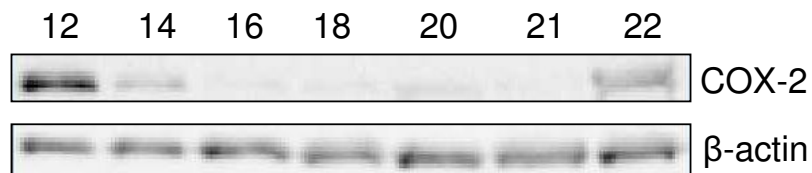

(C)

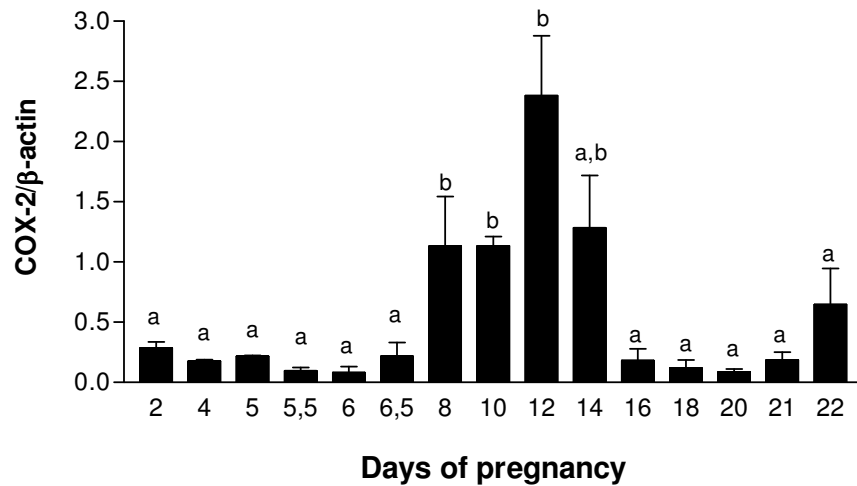

(D)

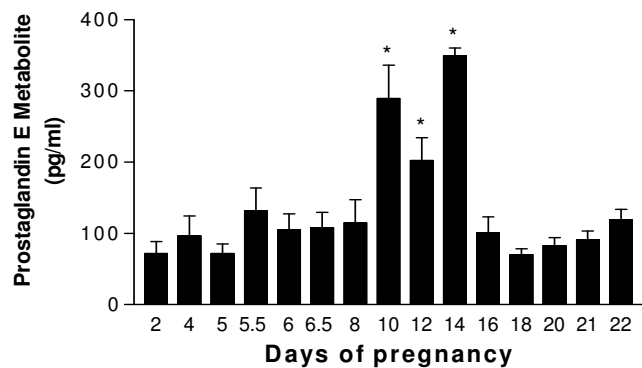

(E)

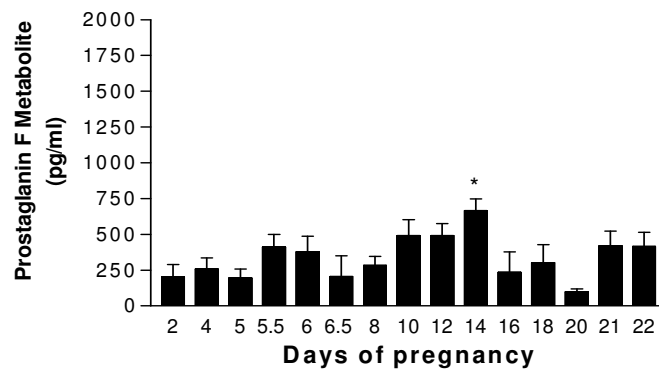

Supplement: MOESM2 [file 9568346]
